# Supplementary material for: Low Temperature Antioxidant Activity QTL Associate with Genomic Regions Involved in Physiological Cold Stress Tolerance Responses in Rice (Oryza sativa L.)
Source: MDPI journal article supplement (doi:10.3390/genes12111700), 2021-10-26
Supplement: s1 [file s1]

## SUPPLEMENTARY FIGURES AND TABLES

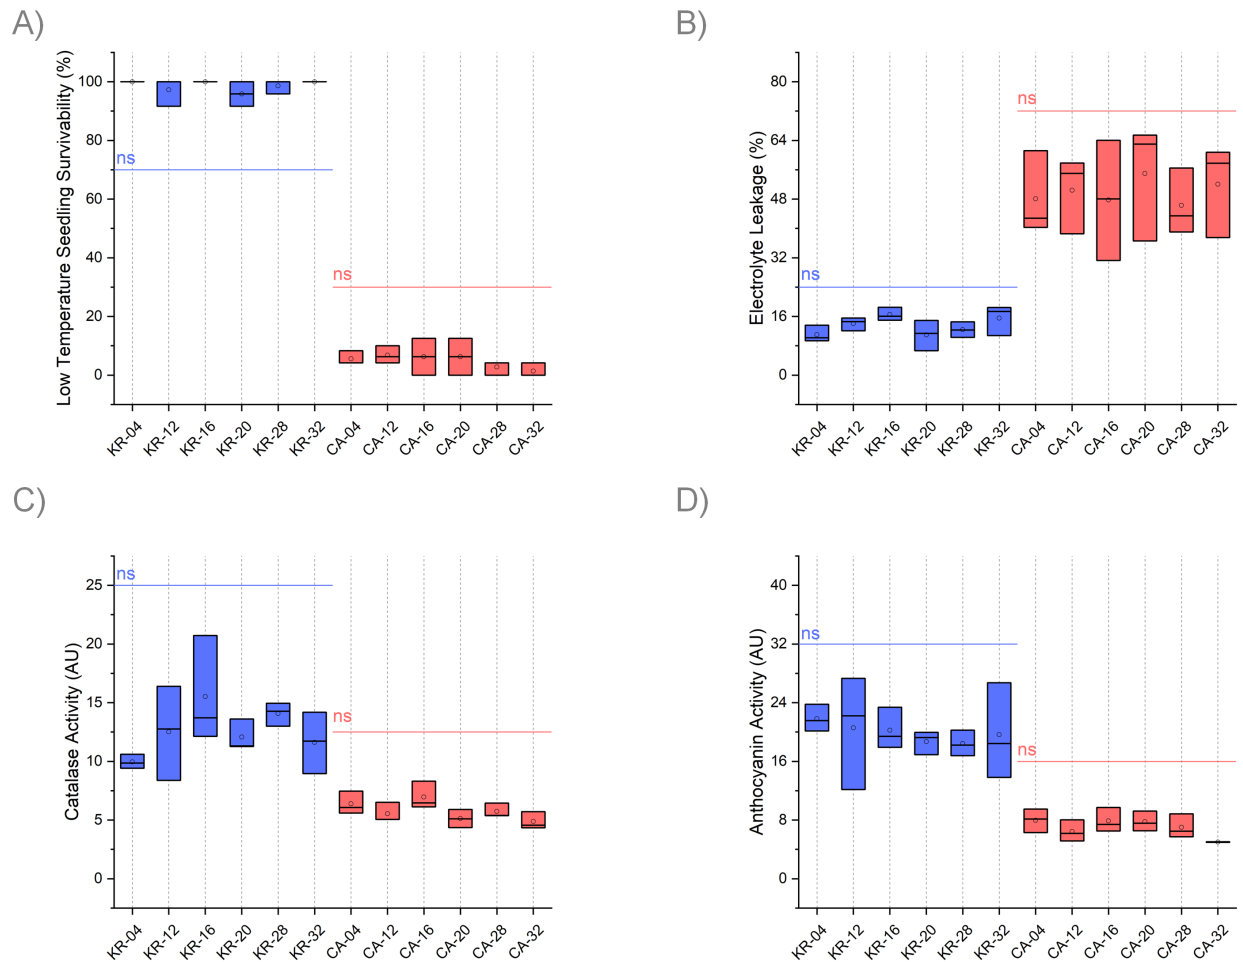

**Supplementary Figure S1.** Box plots of mean values for four cold tolerance response phenotypes after a 7-day-10°C chilling treatment for two cold tolerance check accessions: *temperate japonica* Krasnodarskij 3352 (KR/blue; cold tolerant check) and *aus* Carolino-164 (CA/red; cold sensitive check). **(A)** Low Temperature Seedling Survivability (LTSS) values for rice accessions of the three cold tolerance clusters. **(B)** Electrolyte Leakage (EL) values measuring membrane integrity after chilling stress for rice accessions of the three cold tolerance clusters. **(C)** Catalase (CAT) Activity values measuring enzymatic antioxidative activity for rice accessions of the three cold tolerance clusters. **(D)** Anthocyanin (ANT) Activity values measuring non-enzymatic antioxidative activity for rice accessions of the three cold tolerance clusters. Cold tolerance checks were grown in boxes of randomly selected sets (4, 12, 14, 20, 28, 32) as controls for every six sets of boxes (1-6; 7-12; 13-18; 19-24; 25-30; 31-32) out of 32 sets per experiment to show consistency in the environmental conditions.

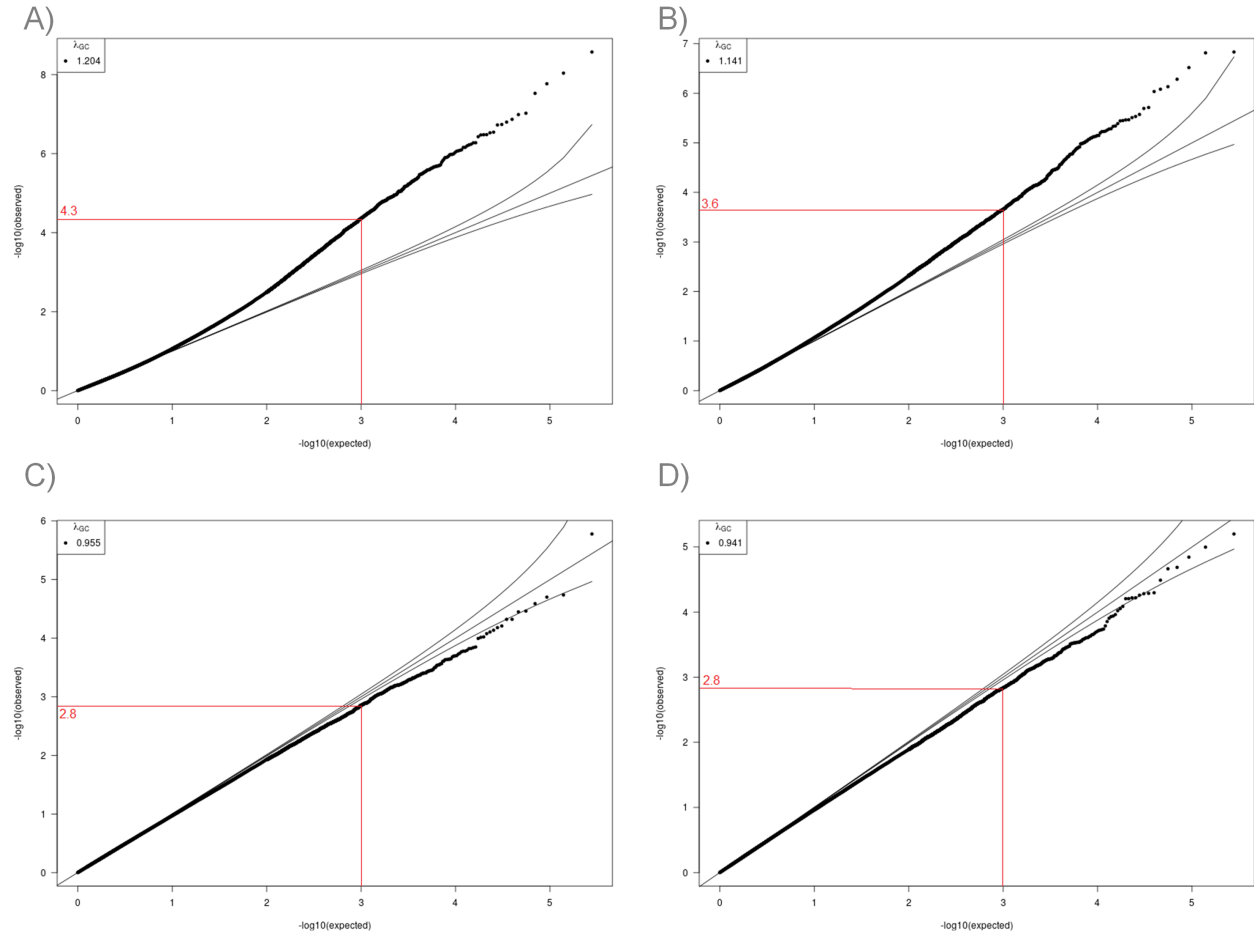

**Supplementary Figure S2.** Quantile-Quantile (QQ) plots of GWAS mapping runs for four cold stress tolerance response phenotypes using 370 RDP1 accessions. (A) Low Temperature Seedling Survivability (LTSS). (B) Electrolyte Leakage (EL). (C) Catalase Activity (CAT). (D) Anthocyanin Activity (ANT). Plots were created using the McCouch et al. 2016 RDP1 GWAS mapping pipeline [37]. Significance cutoff for SNPs meets the following requirements:  $-\log_{10}(p\text{-expected})=3$ , and  $-\log_{10}(p\text{-observed})=4.3$  for LTSS;  $=3.6$  for EL; and  $=2.8$  for both CAT and ANT.

A)

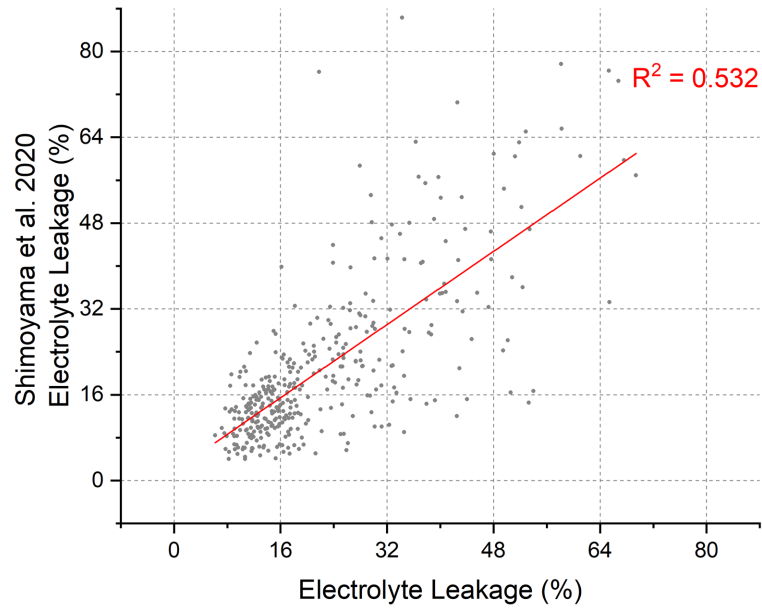

B)

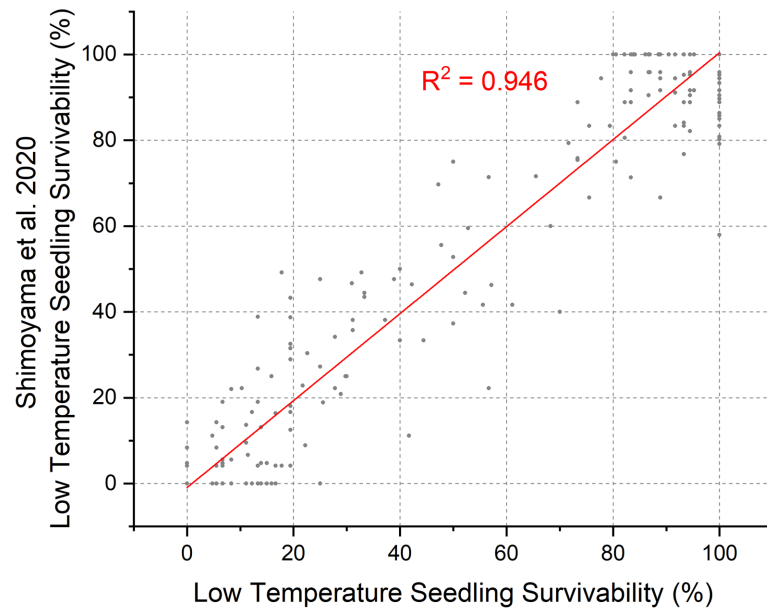

**Supplementary Figure S3.** Correlation analysis of two cold stress tolerance response phenotypes between this study (x-axis) and Shimoyama et al. 2020 <sup>[39]</sup> (y-axis). (A) Electrolyte Leakage (EL). (B) Low Temperature Seedling Survivability (LTSS). A linear fit is shown based on best-fit model calculations.

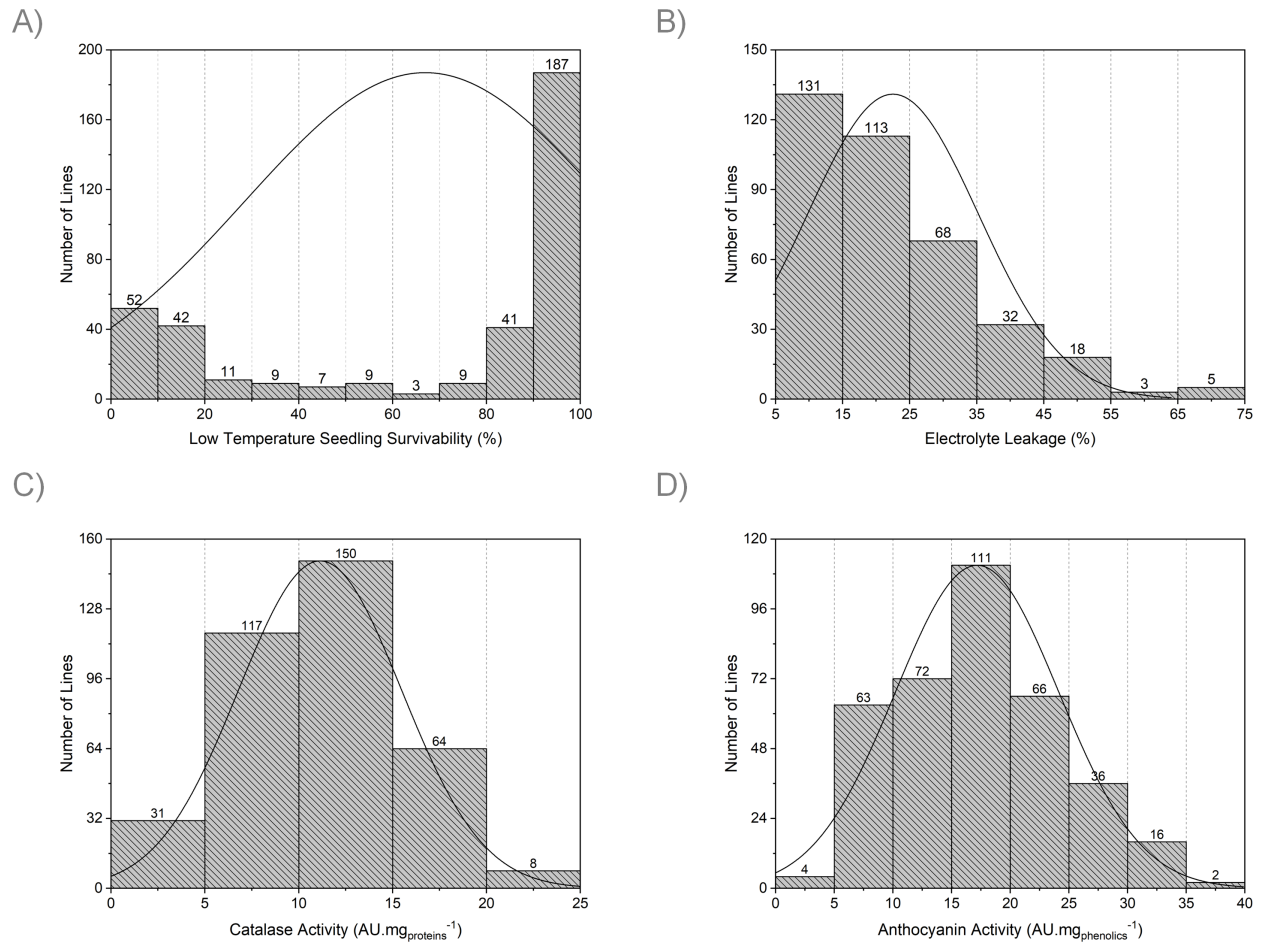

**Supplementary Figure S4.** Distribution analysis of four cold stress tolerance response phenotypes for 370 RDP1 accessions. **(A)** Low Temperature Seedling Survivability (LTSS). **(B)** Electrolyte Leakage (EL). **(C)** Catalase Activity. **(D)** Anthocyanin Activity. A normal distribution curve is calculated for each graph.

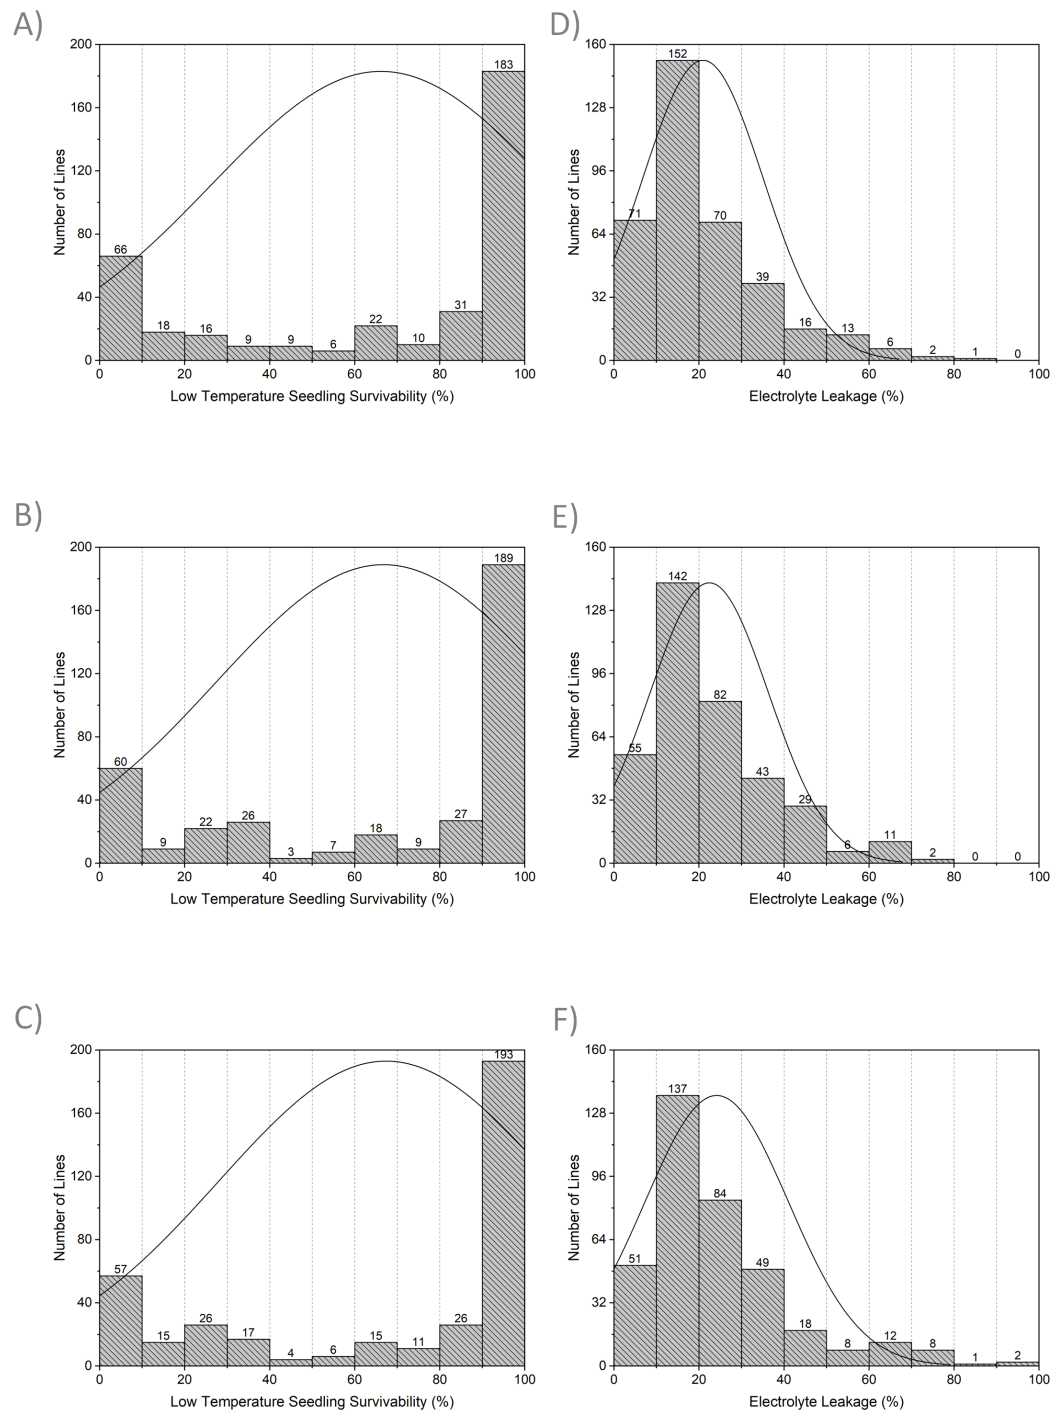

**Supplementary Figure S5.** Distribution analysis of individual LTSS and EL phenotypes for three trials. **(A)** LTSS experiment 1. **(B)** LTSS experiment 2. **(C)** LTSS experiment 3. **(D)** EL experiment 1. **(E)** EL experiment 2. **(F)** EL experiment 3.

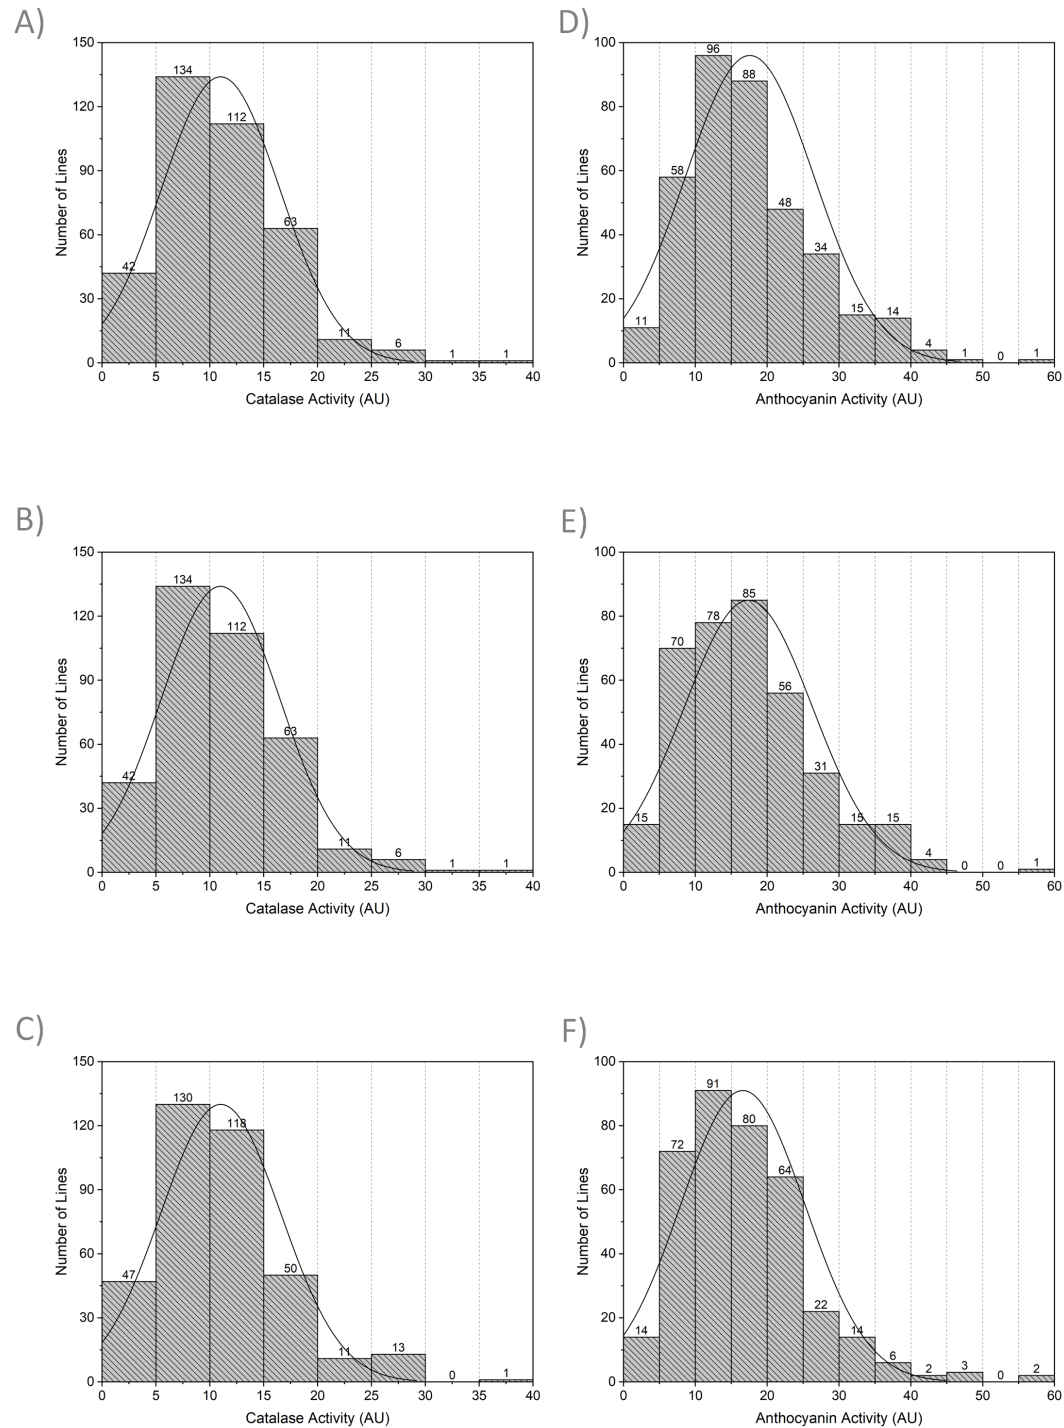

**Supplementary Figure S6.** Distribution analysis of individual CAT and ANT activity phenotypes for three trials. (A) CAT activity experiment 1. (B) CAT activity experiment 2. (C) CAT activity experiment 3. (D) ANT activity experiment 1. (E) ANT activity experiment 2. (F) ANT activity experiment 3.

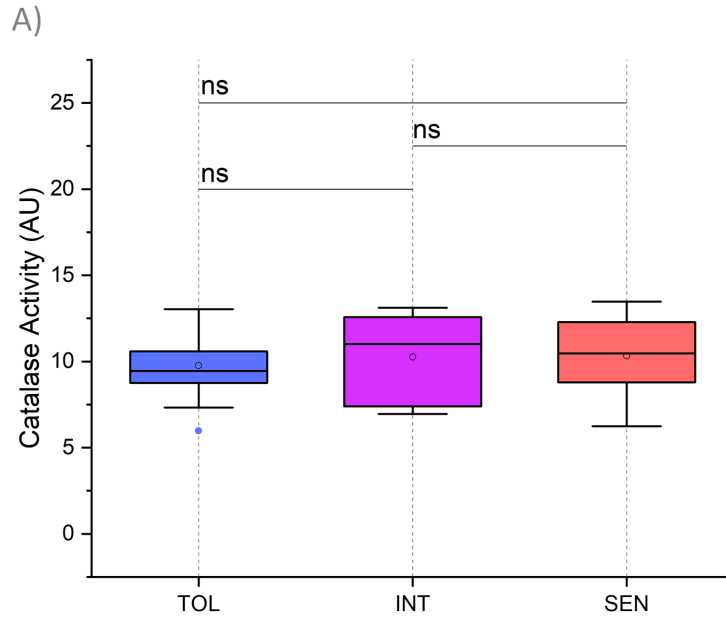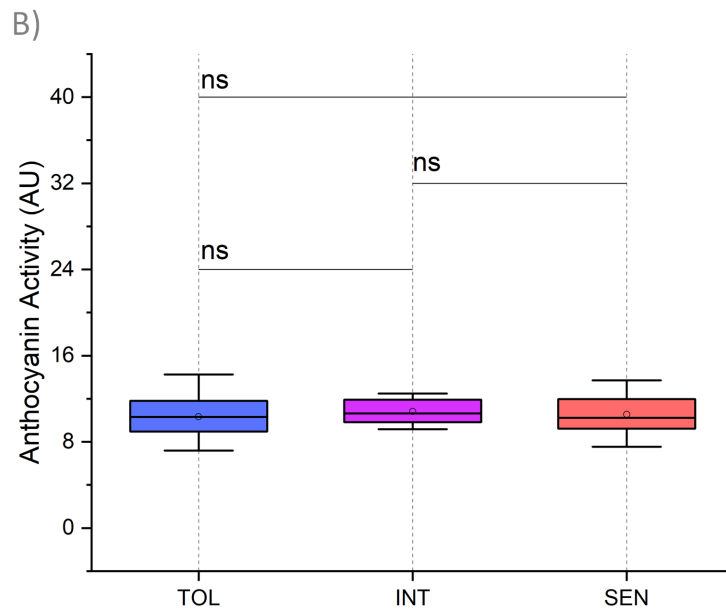

**Supplementary Figure S7.** Box plots of mean values for CAT activity (A) and ANT activity (B) of 14-day-old seedlings for a subset of 70 RDP1 accessions grown under warm control temperature (28°C day/25°C night) conditions.

| Low Temperature Seedling Survivability (%) |                     |         |              |         |         |              |         |         |              |         |         |              |        |
|--------------------------------------------|---------------------|---------|--------------|---------|---------|--------------|---------|---------|--------------|---------|---------|--------------|--------|
|                                            | No. of<br>Cultivars | Trial 1 |              |         | Trial 2 |              |         | Trial 3 |              |         | Overall |              |        |
|                                            |                     | Mean    | Std.<br>Dev. | Var.    | Mean    | Std.<br>Dev. | Var.    | Mean    | Std.<br>Dev. | Var.    | Mean    | Std.<br>Dev. | Var.   |
| ADMIX                                      | 11                  | 81.43   | 32.42        | 1051.02 | 81.36   | 23.58        | 556.01  | 77.88   | 31.88        | 1016.16 | 80.22   | 28.06        | 787.43 |
| ARO                                        | 11                  | 77.10   | 27.35        | 748.09  | 85.45   | 21.04        | 442.83  | 79.24   | 28.20        | 795.20  | 80.60   | 22.60        | 510.72 |
| AUS                                        | 53                  | 11.79   | 14.52        | 210.95  | 11.64   | 14.24        | 202.72  | 15.91   | 17.45        | 304.33  | 13.11   | 9.51         | 90.45  |
| IND                                        | 74                  | 27.85   | 34.11        | 1163.38 | 28.20   | 32.01        | 1024.56 | 26.26   | 31.65        | 1001.89 | 27.44   | 29.99        | 899.49 |
| MIX-I                                      | 6                   | 8.89    | 14.40        | 207.41  | 20.56   | 19.37        | 375.19  | 15.28   | 20.01        | 400.46  | 14.91   | 15.71        | 246.72 |
| MIX-J                                      | 30                  | 95.83   | 11.30        | 127.73  | 94.22   | 14.93        | 222.94  | 93.11   | 13.04        | 170.06  | 94.39   | 10.60        | 112.35 |
| TEJ                                        | 92                  | 95.09   | 11.04        | 121.85  | 93.24   | 12.88        | 165.90  | 96.76   | 7.88         | 62.11   | 95.03   | 7.36         | 54.11  |
| TRJ                                        | 93                  | 91.95   | 13.86        | 192.17  | 94.89   | 12.62        | 159.17  | 94.84   | 10.46        | 109.36  | 93.89   | 9.12         | 83.12  |
| TOL<br>(MIX-J +<br>TEJ +<br>TRJ)           | 215                 | 93.83   | 12.43        | 154.52  | 94.09   | 13.03        | 169.77  | 95.42   | 9.91         | 98.14   | 94.45   | 8.62         | 74.25  |
| INT<br>(ADMIX<br>+ ARO)                    | 22                  | 79.26   | 29.35        | 861.63  | 83.41   | 21.91        | 480.02  | 78.56   | 29.38        | 863.04  | 80.41   | 24.86        | 618.20 |



| <i>SEN</i><br>( <i>AUS</i> +<br><i>IND</i> +<br><i>MIX-I</i> ) | 133                         | 20.59          | 28.31                | 801.22      | 21.25          | 26.92                | 724.89      | 21.64          | 26.76                | 716.12      | 21.16          | 24.34                | 592.29      |
|----------------------------------------------------------------|-----------------------------|----------------|----------------------|-------------|----------------|----------------------|-------------|----------------|----------------------|-------------|----------------|----------------------|-------------|
| <i>All</i>                                                     | 370                         | 66.64          | 40.37                | 1629.87     | 67.27          | 39.79                | 1583.06     | 67.90          | 39.77                | 1581.48     | 67.27          | 38.69                | 1497.05     |
| <b>Electrolyte Leakage (%)</b>                                 |                             |                |                      |             |                |                      |             |                |                      |             |                |                      |             |
|                                                                | <i>No. of<br/>Cultivars</i> | <i>Trial 1</i> |                      |             | <i>Trial 2</i> |                      |             | <i>Trial 3</i> |                      |             | <i>Overall</i> |                      |             |
|                                                                |                             | <i>Mean</i>    | <i>Std.<br/>Dev.</i> | <i>Var.</i> |
| <i>ADMIX</i>                                                   | 11                          | 14.36          | 8.69                 | 75.47       | 15.25          | 9.35                 | 87.49       | 17.62          | 15.04                | 226.08      | 15.74          | 8.87                 | 78.72       |
| <i>ARO</i>                                                     | 11                          | 21.04          | 13.94                | 194.29      | 20.19          | 4.40                 | 19.38       | 17.73          | 8.04                 | 64.67       | 19.65          | 6.46                 | 41.68       |
| <i>AUS</i>                                                     | 53                          | 35.63          | 15.75                | 248.01      | 33.86          | 15.00                | 224.87      | 39.80          | 18.22                | 331.84      | 36.43          | 11.53                | 132.98      |
| <i>IND</i>                                                     | 74                          | 29.52          | 16.35                | 267.18      | 32.47          | 14.90                | 222.11      | 35.43          | 20.20                | 408.15      | 32.47          | 14.09                | 198.52      |
| <i>MIX-I</i>                                                   | 6                           | 32.70          | 8.24                 | 67.91       | 42.04          | 6.16                 | 37.95       | 46.41          | 17.34                | 300.59      | 40.38          | 6.24                 | 38.97       |
| <i>MIX-J</i>                                                   | 30                          | 14.17          | 6.43                 | 41.33       | 14.29          | 7.19                 | 51.64       | 17.01          | 9.19                 | 84.54       | 15.15          | 6.13                 | 37.56       |
| <i>TEJ</i>                                                     | 92                          | 14.83          | 8.01                 | 64.21       | 16.34          | 8.68                 | 75.26       | 15.81          | 8.08                 | 65.35       | 15.66          | 5.66                 | 32.03       |
| <i>TRJ</i>                                                     | 93                          | 13.96          | 6.76                 | 45.72       | 16.39          | 9.48                 | 89.84       | 16.99          | 8.25                 | 68.10       | 15.78          | 5.58                 | 31.18       |
| <i>TOL</i>                                                     | 215                         | 14.36          | 7.26                 | 52.73       | 16.08          | 8.84                 | 78.14       | 16.48          | 8.30                 | 68.86       | 15.64          | 5.67                 | 142.18      |

| (MIX-J +<br>TEJ +<br>TRJ)        |                     |         |              |        |         |              |        |         |              |        |         |              |        |
|----------------------------------|---------------------|---------|--------------|--------|---------|--------------|--------|---------|--------------|--------|---------|--------------|--------|
| INT<br>(ADMIX<br>+ ARO)          | 22                  | 17.70   | 11.84        | 140.13 | 17.72   | 7.57         | 57.26  | 17.68   | 11.77        | 138.46 | 17.70   | 7.83         | 61.33  |
| SEN<br>(AUS +<br>IND +<br>MIX-I) | 133                 | 32.09   | 16.02        | 256.78 | 33.45   | 14.72        | 216.82 | 37.66   | 19.39        | 375.93 | 34.40   | 13.00        | 169.01 |
| All                              | 370                 | 20.94   | 14.18        | 201.07 | 22.42   | 13.96        | 194.80 | 24.17   | 16.88        | 284.85 | 22.51   | 12.75        | 162.46 |
| Catalase Activity (AU)           |                     |         |              |        |         |              |        |         |              |        |         |              |        |
|                                  | No. of<br>Cultivars | Trial 1 |              |        | Trial 2 |              |        | Trial 3 |              |        | Overall |              |        |
|                                  |                     | Mean    | Std.<br>Dev. | Var.   |
| ADMIX                            | 11                  | 10.15   | 3.31         | 10.98  | 13.13   | 6.14         | 37.72  | 12.4    | 4.33         | 18.72  | 11.89   | 2.99         | 8.97   |
| ARO                              | 11                  | 12.99   | 6.09         | 37.07  | 9.85    | 3.58         | 12.84  | 13.05   | 4.77         | 22.73  | 11.96   | 3.79         | 14.37  |
| AUS                              | 53                  | 6.64    | 2.89         | 8.32   | 6.71    | 2.79         | 7.79   | 6.70    | 3.48         | 12.10  | 6.68    | 2.39         | 5.72   |
| IND                              | 74                  | 6.43    | 3.47         | 12.06  | 7.10    | 3.74         | 13.97  | 6.78    | 3.31         | 10.93  | 6.77    | 2.65         | 7.05   |
| MIX-I                            | 6                   | 6.83    | 2.79         | 7.79   | 7.82    | 3.01         | 9.06   | 7.58    | 2.18         | 4.76   | 7.41    | 1.64         | 2.67   |
| MIX-J                            | 30                  | 13.54   | 4.50         | 20.29  | 13.27   | 4.40         | 19.37  | 13.56   | 5.09         | 25.86  | 13.45   | 2.97         | 8.81   |

| <i>TEJ</i>                                                     | 92                          | 14.63          | 5.18                 | 26.79       | 14.69          | 4.94                 | 24.4        | 13.73          | 5.5                  | 30.3        | 14.35          | 2.82                 | 7.96        |
|----------------------------------------------------------------|-----------------------------|----------------|----------------------|-------------|----------------|----------------------|-------------|----------------|----------------------|-------------|----------------|----------------------|-------------|
| <i>TRJ</i>                                                     | 93                          | 12.83          | 4.54                 | 20.58       | 13.81          | 4.37                 | 19.10       | 13.16          | 5.05                 | 25.53       | 13.27          | 2.96                 | 8.79        |
| <i>TOL</i><br>( <i>MIX-J</i> +<br><i>TEJ</i> +<br><i>TRJ</i> ) | 215                         | 13.70          | 4.87                 | 23.70       | 14.11          | 4.64                 | 21.49       | 13.46          | 5.24                 | 27.44       | 13.76          | 2.94                 | 8.62        |
| <i>INT</i><br>( <i>ADMIX</i><br>+ <i>ARO</i> )                 | 22                          | 11.57          | 5.00                 | 25.00       | 11.49          | 5.19                 | 26.91       | 12.72          | 4.46                 | 19.85       | 11.93          | 3.33                 | 11.11       |
| <i>SEN</i><br>( <i>AUS</i> +<br><i>IND</i> +<br><i>MIX-I</i> ) | 133                         | 6.53           | 3.20                 | 10.26       | 6.98           | 3.35                 | 11.21       | 6.78           | 3.32                 | 11.03       | 6.76           | 2.50                 | 6.27        |
| <i>All</i>                                                     | 370                         | 11.00          | 5.50                 | 30.30       | 11.39          | 5.42                 | 29.33       | 11.02          | 5.58                 | 31.09       | 11.13          | 4.34                 | 18.81       |
| <b>Anthocyanin Activity (AU)</b>                               |                             |                |                      |             |                |                      |             |                |                      |             |                |                      |             |
|                                                                | <i>No. of<br/>Cultivars</i> | <i>Trial 1</i> |                      |             | <i>Trial 2</i> |                      |             | <i>Trial 3</i> |                      |             | <i>Overall</i> |                      |             |
|                                                                |                             | <i>Mean</i>    | <i>Std.<br/>Dev.</i> | <i>Var.</i> |
| <i>ADMIX</i>                                                   | 11                          | 14.09          | 4.81                 | 23.17       | 16.12          | 6.83                 | 46.58       | 15.76          | 6.22                 | 38.63       | 15.33          | 4.42                 | 19.55       |
| <i>ARO</i>                                                     | 11                          | 21.55          | 7.57                 | 57.31       | 18.03          | 8.87                 | 78.69       | 21.84          | 6.41                 | 41.04       | 20.47          | 6.48                 | 41.96       |
| <i>AUS</i>                                                     | 53                          | 10.7           | 4.77                 | 22.71       | 9.99           | 3.79                 | 14.35       | 10.2           | 4.27                 | 18.23       | 10.3           | 3.04                 | 9.26        |
| <i>IND</i>                                                     | 74                          | 11.05          | 4.69                 | 22.01       | 10.28          | 5.34                 | 28.5        | 10.43          | 5.15                 | 26.53       | 10.59          | 3.61                 | 13          |

|                                                                |     |       |      |       |       |      |       |       |      |       |       |      |       |
|----------------------------------------------------------------|-----|-------|------|-------|-------|------|-------|-------|------|-------|-------|------|-------|
| <i>MIX-I</i>                                                   | 6   | 8.19  | 1.74 | 3.04  | 11.28 | 5.59 | 31.26 | 6.91  | 3.08 | 9.49  | 8.8   | 1.99 | 3.97  |
| <i>MIX-J</i>                                                   | 30  | 19.28 | 7.61 | 57.98 | 23.15 | 8.33 | 69.45 | 19.19 | 6.32 | 39.91 | 20.54 | 4.78 | 22.82 |
| <i>TEJ</i>                                                     | 92  | 23.08 | 9.04 | 81.77 | 22.61 | 8.25 | 68.03 | 21.14 | 8.25 | 68.02 | 22.28 | 5.47 | 29.97 |
| <i>TRJ</i>                                                     | 93  | 21.2  | 8.1  | 65.56 | 20.56 | 7.24 | 52.4  | 19.96 | 9.13 | 83.29 | 20.57 | 5.08 | 25.82 |
| <i>TOL</i><br>( <i>MIX-J</i> +<br><i>TEJ</i> +<br><i>TRJ</i> ) | 215 | 21.74 | 8.52 | 72.56 | 21.8  | 7.88 | 62.07 | 20.36 | 8.41 | 70.67 | 21.3  | 5.26 | 27.66 |
| <i>INT</i><br>( <i>ADMIX</i><br>+ <i>ARO</i> )                 | 22  | 17.82 | 7.27 | 52.92 | 17.08 | 7.78 | 60.6  | 18.8  | 6.9  | 47.61 | 17.9  | 6.02 | 36.23 |
| <i>SEN</i><br>( <i>AUS</i> +<br><i>IND</i> +<br><i>MIX-I</i> ) | 133 | 10.78 | 4.65 | 21.58 | 10.21 | 4.76 | 22.67 | 10.18 | 4.77 | 22.74 | 10.39 | 3.34 | 11.13 |
| <i>All</i>                                                     | 370 | 17.57 | 8.92 | 79.53 | 17.35 | 8.8  | 77.47 | 16.61 | 8.67 | 75.19 | 17.17 | 6.97 | 48.6  |

**Supplementary Table S1.** Means, standard deviations, and variances of individual trials for four phenotyping assays using 370 RDP1 *O. sativa* accessions after a 7-day-10°C chilling treatment.

| QTL            | Chromosome | Start    | End      | Phenotype | Peak LOD Score | Peak SNP Gene                                  |
|----------------|------------|----------|----------|-----------|----------------|------------------------------------------------|
| <i>qANT1-1</i> | 1          | 7486614  | 8230878  | ANT       | 3.54           | –                                              |
| <i>qANT1-2</i> | 1          | 9773339  | 10350457 | ANT       | 3.70           | –                                              |
| <i>qANT1-3</i> | 1          | 12596561 | 13071111 | ANT       | 3.10           | <i>LOC_Os01g22954</i><br><i>LOC_Os01g22980</i> |
| <i>qANT1-4</i> | 1          | 14626447 | 14810822 | ANT       | 4.84           | <i>LOC_Os01g25960</i>                          |
| <i>qANT1-5</i> | 1          | 18651600 | 18916961 | ANT       | 3.16           | <i>LOC_Os01g34310</i>                          |
| <i>qANT1-6</i> | 1          | 40773126 | 40950294 | ANT       | 3.79           | –                                              |
| <i>qANT2-1</i> | 2          | 19500004 | 20628603 | ANT       | 3.05           | –                                              |
| <i>qANT2-2</i> | 2          | 20789839 | 20971831 | ANT       | 3.33           | –                                              |
| <i>qANT2-3</i> | 2          | 25700171 | 25992998 | ANT       | 3.18           | –                                              |
| <i>qANT2-4</i> | 2          | 31287454 | 33240427 | ANT       | 3.72           | <i>LOC_Os02g54210</i>                          |
| <i>qANT3-1</i> | 3          | 10104198 | 10986174 | ANT       | 3.04           | <i>LOC_Os03g19104</i>                          |
| <i>qANT3-2</i> | 3          | 22831637 | 23578802 | ANT       | 3.30           | –                                              |
| <i>qANT4-1</i> | 4          | 3362640  | 3784630  | ANT       | 3.72           | <i>LOC_Os04g06790</i>                          |
| <i>qANT4-2</i> | 4          | 4150962  | 4265645  | ANT       | 2.99           | <i>LOC_Os04g07830</i>                          |
| <i>qANT4-3</i> | 4          | 20718231 | 20738002 | ANT       | 4.21           | –                                              |
| <i>qANT5-1</i> | 5          | 3021633  | 4377698  | ANT       | 3.45           | –                                              |
| <i>qANT5-2</i> | 5          | 25330495 | 26414180 | ANT       | 3.53           | –                                              |
| <i>qANT6-1</i> | 6          | 19661655 | 20361856 | ANT       | 3.63           | <i>LOC_Os06g34910</i>                          |
| <i>qANT6-2</i> | 6          | 25767289 | 27349049 | ANT       | 5.00           | –                                              |
| <i>qANT7-1</i> | 7          | 4620300  | 4665149  | ANT       | 3.05           | <i>LOC_Os07g08890</i>                          |
| <i>qANT7-2</i> | 7          | 7490073  | 8643262  | ANT       | 3.58           | <i>LOC_Os07g15080</i>                          |
| <i>qANT8-1</i> | 8          | 2428291  | 3346129  | ANT       | 4.20           | –                                              |

|                 |    |          |          |     |      |                                                |
|-----------------|----|----------|----------|-----|------|------------------------------------------------|
| <i>qANT8-2</i>  | 8  | 14193950 | 15347615 | ANT | 3.33 | <i>LOC_Os08g23440</i>                          |
| <i>qANT8-3</i>  | 8  | 21298422 | 21317944 | ANT | 3.45 | —                                              |
| <i>qANT8-4</i>  | 8  | 25393379 | 26410436 | ANT | 4.69 | —                                              |
| <i>qANT9-1</i>  | 9  | 13119602 | 13800265 | ANT | 3.28 | <i>LOC_Os09g23250</i>                          |
| <i>qANT10-1</i> | 10 | 11675173 | 12345517 | ANT | 3.19 | —                                              |
| <i>qANT10-2</i> | 10 | 12997744 | 14025821 | ANT | 4.02 | —                                              |
| <i>qANT10-3</i> | 10 | 15461315 | 15790283 | ANT | 3.54 | <i>LOC_Os10g30380</i>                          |
| <i>qANT11-1</i> | 11 | 5570572  | 5826004  | ANT | 4.30 | —                                              |
| <i>qANT11-2</i> | 11 | 24826908 | 26284095 | ANT | 4.22 | —                                              |
| <i>qANT11-3</i> | 11 | 28342262 | 28475216 | ANT | 3.53 | —                                              |
| <i>qANT12-1</i> | 12 | 902978   | 2390059  | ANT | 4.49 | <i>LOC_Os12g02670</i>                          |
| <i>qANT12-2</i> | 12 | 14551221 | 14974543 | ANT | 3.96 | <i>LOC_Os12g25660</i>                          |
| <i>qCAT1-1</i>  | 1  | 8815238  | 9587843  | CAT | 3.13 | —                                              |
| <i>qCAT1-2</i>  | 1  | 10051543 | 10713488 | CAT | 3.70 | <i>LOC_Os01g18950</i>                          |
| <i>qCAT1-3</i>  | 1  | 18219382 | 19606123 | CAT | 3.41 | —                                              |
| <i>qCAT1-4</i>  | 1  | 22290853 | 23591174 | CAT | 3.70 | —                                              |
| <i>qCAT1-5</i>  | 1  | 32077250 | 32971038 | CAT | 3.17 | <i>LOC_Os01g55700</i><br><i>LOC_Os01g55690</i> |
| <i>qCAT1-6</i>  | 1  | 33508366 | 34917881 | CAT | 3.30 | <i>LOC_Os01g60360</i>                          |
| <i>qCAT1-7</i>  | 1  | 37434095 | 38941678 | CAT | 3.21 | <i>LOC_Os01g65200</i>                          |
| <i>qCAT4-1</i>  | 4  | 2699247  | 2729293  | CAT | 3.44 | <i>LOC_Os04g05420</i>                          |
| <i>qCAT4-2</i>  | 4  | 27694251 | 28887295 | CAT | 3.32 | <i>LOC_Os04g48370</i>                          |
| <i>qCAT4-3</i>  | 4  | 31662483 | 32401404 | CAT | 4.14 | —                                              |
| <i>qCAT4-4</i>  | 4  | 33478908 | 34926977 | CAT | 3.85 | —                                              |
| <i>qCAT5-1</i>  | 5  | 3512674  | 4775386  | CAT | 3.40 | <i>LOC_Os05g07690</i>                          |

|                 |    |          |          |     |      |                       |
|-----------------|----|----------|----------|-----|------|-----------------------|
| <i>qCAT5-2</i>  | 5  | 8661995  | 9888457  | CAT | 3.64 | –                     |
| <i>qCAT5-3</i>  | 5  | 14916027 | 15757372 | CAT | 5.78 | –                     |
| <i>qCAT5-4</i>  | 5  | 17772273 | 18678752 | CAT | 3.37 | –                     |
| <i>qCAT5-5</i>  | 5  | 22624937 | 23564490 | CAT | 3.74 | –                     |
| <i>qCAT6-1</i>  | 6  | 7521403  | 8375233  | CAT | 3.17 | –                     |
| <i>qCAT6-2</i>  | 6  | 23626779 | 24556297 | CAT | 4.00 | –                     |
| <i>qCAT7-1</i>  | 7  | 15594791 | 15630559 | CAT | 3.49 | <i>LOC_Os07g27000</i> |
| <i>qCAT7-2</i>  | 7  | 16129188 | 16960602 | CAT | 3.20 | –                     |
| <i>qCAT8-1</i>  | 8  | 3078138  | 3557583  | CAT | 4.21 | –                     |
| <i>qCAT8-2</i>  | 8  | 4686803  | 5100589  | CAT | 4.45 | –                     |
| <i>qCAT10-1</i> | 10 | 11565763 | 12409728 | CAT | 3.19 | –                     |
| <i>qCAT11-1</i> | 11 | 1956923  | 2809151  | CAT | 4.70 | <i>LOC_Os11g04770</i> |
| <i>qCAT11-2</i> | 11 | 10841118 | 10900649 | CAT | 3.26 | <i>LOC_Os11g19030</i> |
| <i>qCAT11-3</i> | 11 | 13056051 | 14038623 | CAT | 4.32 | –                     |
| <i>qCAT11-4</i> | 11 | 16085790 | 16938996 | CAT | 3.65 | <i>LOC_Os11g27970</i> |
| <i>qCAT11-5</i> | 11 | 17936031 | 18155767 | CAT | 3.22 | <i>LOC_Os11g30790</i> |
| <i>qCAT12-1</i> | 12 | 8027010  | 8888292  | CAT | 4.01 | –                     |
| <i>qCAT12-2</i> | 12 | 9435619  | 10107608 | CAT | 3.29 | <i>LOC_Os12g17650</i> |
| <i>qCAT12-3</i> | 12 | 22396394 | 22597096 | CAT | 3.51 | <i>LOC_Os12g36860</i> |
| <i>qEL1-1</i>   | 1  | 5376814  | 6217016  | EL  | 4.27 | –                     |
| <i>qEL1-2</i>   | 1  | 21635429 | 22489300 | EL  | 4.27 | <i>LOC_Os01g38740</i> |
| <i>qEL1-3</i>   | 1  | 36919761 | 37862889 | EL  | 4.77 | –                     |
| <i>qEL2-1</i>   | 2  | 5367701  | 6404909  | EL  | 5.20 | –                     |
| <i>qEL2-2</i>   | 2  | 28049683 | 29312571 | EL  | 6.04 | –                     |

|                |    |          |          |    |      |                       |
|----------------|----|----------|----------|----|------|-----------------------|
| <i>qEL2-3</i>  | 2  | 35713099 | 35777317 | EL | 4.40 | <i>LOC_Os02g58400</i> |
| <i>qEL3-1</i>  | 3  | 4957753  | 5255713  | EL | 4.57 | —                     |
| <i>qEL3-2</i>  | 3  | 14243353 | 15319978 | EL | 5.39 | —                     |
| <i>qEL3-3</i>  | 3  | 21286603 | 21341380 | EL | 4.46 | —                     |
| <i>qEL3-4</i>  | 3  | 30678991 | 30878159 | EL | 3.86 | —                     |
| <i>qEL4-1</i>  | 4  | 209964   | 813396   | EL | 5.71 | —                     |
| <i>qEL4-2</i>  | 4  | 2462372  | 2841611  | EL | 5.47 | <i>LOC_Os04g05370</i> |
| <i>qEL4-3</i>  | 4  | 3426042  | 4453290  | EL | 4.73 | <i>LOC_Os04g06700</i> |
| <i>qEL4-4</i>  | 4  | 5062444  | 5215299  | EL | 4.24 | <i>LOC_Os04g09654</i> |
| <i>qEL4-5</i>  | 4  | 15936644 | 16045503 | EL | 4.67 | —                     |
| <i>qEL5-1</i>  | 5  | 5533680  | 6761776  | EL | 4.71 | —                     |
| <i>qEL5-2</i>  | 5  | 23154623 | 23812327 | EL | 6.08 | —                     |
| <i>qEL7-1</i>  | 7  | 18672662 | 19698141 | EL | 5.33 | —                     |
| <i>qEL8-1</i>  | 8  | 6312060  | 7733651  | EL | 4.22 | —                     |
| <i>qEL9-1</i>  | 9  | 495867   | 1327074  | EL | 5.28 | <i>LOC_Os09g02360</i> |
| <i>qEL9-2</i>  | 9  | 16868508 | 17684880 | EL | 6.13 | <i>LOC_Os09g29110</i> |
| <i>qEL10-1</i> | 10 | 19944099 | 20831382 | EL | 5.00 | —                     |
| <i>qEL11-1</i> | 11 | 2685973  | 2766157  | EL | 3.69 | —                     |
| <i>qEL11-2</i> | 11 | 14196428 | 14717817 | EL | 4.29 | <i>LOC_Os11g24930</i> |
| <i>qEL11-3</i> | 11 | 17425263 | 17627357 | EL | 5.53 | <i>LOC_Os11g29980</i> |
| <i>qEL11-4</i> | 11 | 18782766 | 19184008 | EL | 4.47 | —                     |
| <i>qEL11-5</i> | 11 | 22031752 | 22996111 | EL | 4.99 | —                     |
| <i>qEL11-6</i> | 11 | 27564332 | 28697913 | EL | 6.83 | <i>LOC_Os11g45530</i> |
| <i>qEL12-1</i> | 12 | 6958080  | 8406160  | EL | 5.26 | <i>LOC_Os12g14680</i> |



|                  |    |          |          |      |      |                       |
|------------------|----|----------|----------|------|------|-----------------------|
| <i>qEL12-2</i>   | 12 | 9046310  | 9819447  | EL   | 4.14 | –                     |
| <i>qLTSS1-1</i>  | 1  | 3012508  | 3588139  | LTSS | 5.17 | –                     |
| <i>qLTSS1-2</i>  | 1  | 6217016  | 7070844  | LTSS | 6.08 | –                     |
| <i>qLTSS1-3</i>  | 1  | 8815194  | 9418864  | LTSS | 5.31 | –                     |
| <i>qLTSS1-4</i>  | 1  | 18792455 | 18989383 | LTSS | 4.96 | <i>LOC_Os01g34430</i> |
| <i>qLTSS3-1</i>  | 3  | 8169374  | 8209158  | LTSS | 7.77 | <i>LOC_Os03g14980</i> |
| <i>qLTSS3-2</i>  | 3  | 10032950 | 10284651 | LTSS | 5.46 | –                     |
| <i>qLTSS3-3</i>  | 3  | 21124409 | 22179741 | LTSS | 5.22 | –                     |
| <i>qLTSS3-4</i>  | 3  | 24553451 | 24646868 | LTSS | 5.66 | –                     |
| <i>qLTSS4-1</i>  | 4  | 18188624 | 19063931 | LTSS | 5.24 | –                     |
| <i>qLTSS4-2</i>  | 4  | 32076622 | 32422788 | LTSS | 7.53 | –                     |
| <i>qLTSS5-1</i>  | 5  | 20728233 | 21496273 | LTSS | 6.10 | <i>LOC_Os05g35140</i> |
| <i>qLTSS6-1</i>  | 6  | 4696360  | 4973808  | LTSS | 6.52 | –                     |
| <i>qLTSS6-2</i>  | 6  | 11948492 | 12073609 | LTSS | 6.07 | –                     |
| <i>qLTSS8-1</i>  | 8  | 16343497 | 17184778 | LTSS | 4.95 | –                     |
| <i>qLTSS8-2</i>  | 8  | 18000666 | 18923306 | LTSS | 5.90 | <i>LOC_Os08g30680</i> |
| <i>qLTSS8-3</i>  | 8  | 21253044 | 22052077 | LTSS | 5.27 | –                     |
| <i>qLTSS8-4</i>  | 8  | 25620369 | 25655572 | LTSS | 6.22 | –                     |
| <i>qLTSS9-1</i>  | 9  | 16351083 | 17147264 | LTSS | 7.02 | <i>LOC_Os09g27710</i> |
| <i>qLTSS10-1</i> | 10 | 1789478  | 2402873  | LTSS | 5.89 | –                     |
| <i>qLTSS10-2</i> | 10 | 5282251  | 5324028  | LTSS | 5.53 | –                     |
| <i>qLTSS10-3</i> | 10 | 13841307 | 14851265 | LTSS | 6.99 | <i>LOC_Os10g27360</i> |
| <i>qLTSS10-4</i> | 10 | 21081923 | 22064791 | LTSS | 4.97 | <i>LOC_Os10g40612</i> |
| <i>qLTSS11-1</i> | 11 | 2073424  | 2766157  | LTSS | 6.43 | –                     |

|                  |    |          |          |      |      |                       |
|------------------|----|----------|----------|------|------|-----------------------|
| <i>qLTSS12-1</i> | 12 | 2192895  | 3113518  | LTSS | 6.47 | <i>LOC_Os12g05040</i> |
| <i>qLTSS12-2</i> | 12 | 22607831 | 22668332 | LTSS | 6.48 | <i>LOC_Os12g36890</i> |

**Supplementary Table S2.** Summary of 120 quantitative trait loci (QTL) identified by GWAS mapping for four cold stress tolerance response traits using 370 RDP1 accessions. LTSS: Low Temperature Seedling Survivability; EL: Electrolyte Leakage; CAT: Catalase Activity; ANT: Anthocyanin Activity; LOD: Logarithm of the Odds; SNP: Single Nucleotide Polymorphism.

| QTL             | Chromosome | Location              | Phenotype(s)                                                                                                                    | Publication           |
|-----------------|------------|-----------------------|---------------------------------------------------------------------------------------------------------------------------------|-----------------------|
| <i>qMT1-1</i>   | 1          | 10527625 – 11389874   | Electrolyte Leakage at 10°C<br>Low Temperature Seedling Survivability at 10°C                                                   | Shimoyama et al. 2020 |
| <i>qMT1-4</i>   | 1          | 19518259 – 20986910   | Electrolyte Leakage at 8°C<br>Electrolyte Leakage at 12°C                                                                       | Shimoyama et al. 2020 |
| <i>qCTS1-2</i>  | 1          | 18680885 – 19680885   | Cold Tolerance Score at 8°C                                                                                                     | Wang et al. 2016      |
| <i>qCTS1-4</i>  | 1          | 40885263 – 41885263   | Cold Tolerance Score at 8°C                                                                                                     | Wang et al. 2016      |
| <i>qLVG3</i>    | 3          | ~ 9500000 – 12700000  | Electrolyte Leakage at 4°C<br>Electrolyte Leakage at 5-12°C                                                                     | Lv et al. 2016        |
| <i>qCTS4-1</i>  | 4          | 5350082 – 6350082     | Cold Tolerance Score at 8°C                                                                                                     | Wang et al. 2016      |
| <i>qMT4-3</i>   | 4          | 34467694 – 35089971   | Electrolyte Leakage at 4°C<br>Low Temperature Seedling Survivability at 10°C                                                    | Shimoyama et al. 2020 |
| <i>qLTSS4-3</i> | 4          | ~ 34200000 – 35200000 | Low Temperature Seedling Survivability at 10°C                                                                                  | Schläppi et al. 2017  |
| <i>qLTG-4</i>   | 4          | ~ 30000000 – 33000000 | Electrolyte Leakage at 4°C<br>Electrolyte Leakage at 5-12°C                                                                     | Lv et al. 2016        |
| <i>qLTG5-1</i>  | 5          | ~ 4300000 – 7400000   | Electrolyte Leakage at 4°C<br>Electrolyte Leakage at 5-12°C                                                                     | Lv et al. 2016        |
| <i>qCTS5-1</i>  | 5          | 1470193 – 2470193     | Cold Tolerance Score at 8°C                                                                                                     | Wang et al. 2016      |
| <i>qMP5-2</i>   | 5          | 6600746 – 8783967     | Electrolyte Leakage at 10°C<br>Low Temperature Seedling Survivability at 10°C<br>Low Temperature Seedling Survivability at 12°C | Shimoyama et al. 2020 |
| <i>qCTSS-5</i>  | 5          | ~ 25600000 – 28000000 | Electrolyte Leakage at 4°C<br>Electrolyte Leakage at 5-12°C                                                                     | Lv et al. 2016        |
| <i>qCTS5-4</i>  | 5          | 24116513 – 34116513   | Cold Tolerance Score at 8°C                                                                                                     | Wang et al. 2016      |

|                  |    |                       |                                                                                                                                |                       |
|------------------|----|-----------------------|--------------------------------------------------------------------------------------------------------------------------------|-----------------------|
| <i>qMT8-1</i>    | 8  | 4409763 – 5060164     | Electrolyte Leakage at 12°C<br>Low Temperature Seedling Survivability at 12°C                                                  | Shimoyama et al. 2020 |
| <i>qLTSS8-1</i>  | 8  | ~ 5200000 – 6200000   | Low Temperature Seedling Survivability at 10°C                                                                                 | Schläppi et al. 2017  |
| <i>qMT8-3</i>    | 8  | 16369660 – 16896911   | Low Temperature Seedling Survivability at 4°C<br>Low Temperature Seedling Survivability at 12°C                                | Shimoyama et al. 2020 |
| <i>qLTSS8-2</i>  | 8  | ~ 14900000 – 15900000 | Low Temperature Seedling Survivability at 10°C                                                                                 | Schläppi et al. 2017  |
| <i>COLD2</i>     | 8  | ~ 22900000 – 25600000 | Electrolyte Leakage at 4°C<br>Electrolyte Leakage at 5-12°C                                                                    | Lv et al. 2016        |
| <i>qCTS8-4</i>   | 8  | 19885371 – 20885371   | Cold Tolerance Score at 8°C                                                                                                    | Wang et al. 2016      |
| <i>qMT8-4</i>    | 8  | 26014290 – 27371604   | Electrolyte Leakage at 8°C<br>Electrolyte Leakage at 10°C<br>Low Temperature Seedling Survivability at 16°C                    | Shimoyama et al. 2020 |
| <i>qLTSS10-2</i> | 10 | ~ 11100000 – 12100000 | Low Temperature Seedling Survivability at 10°C                                                                                 | Schläppi et al. 2017  |
| <i>qCTSS-10</i>  | 10 | ~ 12000000 – 16000000 | Electrolyte Leakage at 4°C<br>Electrolyte Leakage at 5-12°C                                                                    | Lv et al. 2016        |
| <i>qMT10-4</i>   | 10 | 12242058 – 15899908   | Low Temperature Seedling Survivability at 10°C<br>Low Temperature Seedling Survivability at 12°C                               | Shimoyama et al. 2020 |
| <i>qMT11-3</i>   | 11 | 25159572 – 25809234   | Low Temperature Seedling Survivability at 10°C<br>Low Temperature Seedling Survivability at 12°C                               | Shimoyama et al. 2020 |
| <i>qMT12</i>     | 12 | 2192895 – 4043986     | Electrolyte Leakage at 8°C<br>Low Temperature Seedling Survivability at 10°C<br>Low Temperature Seedling Survivability at 12°C | Shimoyama et al. 2020 |
| <i>qCTSS-12</i>  | 12 | ~ 5500000 – 9600000   | Electrolyte Leakage at 4°C<br>Electrolyte Leakage at 5-12°C                                                                    | Lv et al. 2016        |

**Supplementary Table 3.** Positions of published QTL overlapping with the 20 *MP* QTL identified in this GWAS mapping study.
